# Supplementary material
Source: Elsevier journal article supplement (https://www.sciencedirect.com/science/article/pii/S0375090622001045)
Supplement: mmc1 [file S0375090622001045:mmc1.pdf]

## ANEXO 1: CUESTIONARIO SOBRE LA SALUD DEL PACIENTE (PHQ-9)

| CUESTIONARIO SOBRE LA SALUD DEL PACIENTE-9 (PHQ-9)                                                                                                                            |            |             |                             |                     |
|-------------------------------------------------------------------------------------------------------------------------------------------------------------------------------|------------|-------------|-----------------------------|---------------------|
| Durante las últimas 2 semanas, ¿qué tan seguido ha tenido molestias debido a los siguientes problemas?<br>(Marque con un " " para indicar su respuesta)                       | Ningún día | Varios días | Más de la mitad de los días | Casi todos los días |
| 1. Poco interés o placer en hacer cosas                                                                                                                                       | 0          | 1           | 2                           | 3                   |
| 2. Se ha sentido decaído(a), deprimido(a) o sin esperanzas                                                                                                                    | 0          | 1           | 2                           | 3                   |
| 3. Ha tenido dificultad para quedarse o permanecer dormido(a), o ha dormido demasiado                                                                                         | 0          | 1           | 2                           | 3                   |
| 4. Se ha sentido cansado(a) o con poca energía                                                                                                                                | 0          | 1           | 2                           | 3                   |
| 5. Sin apetito o ha comido en exceso                                                                                                                                          | 0          | 1           | 2                           | 3                   |
| 6. Se ha sentido mal con usted mismo(a) – o que es un fracaso o que ha quedado mal con usted mismo(a) o con su familia                                                        | 0          | 1           | 2                           | 3                   |
| 7. Ha tenido dificultad para concentrarse en ciertas actividades, tales como leer el periódico o ver la televisión                                                            | 0          | 1           | 2                           | 3                   |
| 8. ¿Se ha movido o hablado tan lento que otras personas podrían haberlo notado? o lo contrario – muy inquieto(a) o agitado(a) que ha estado moviéndose mucho más de lo normal | 0          | 1           | 2                           | 3                   |
| 9. Pensamientos de que estaría mejor muerto(a) o de lastimarse de alguna manera                                                                                               | 0          | 1           | 2                           | 3                   |

For office coding: 0 + \_\_\_\_\_ + \_\_\_\_\_ + \_\_\_\_\_

=Total Score: \_\_\_\_\_

---

Si marcó cualquiera de los problemas, ¿qué tanta dificultad le han dado estos problemas para hacer su trabajo, encargarse de las tareas del hogar, o llevarse bien con otras personas?

|                                                |                                             |                                         |                                                    |
|------------------------------------------------|---------------------------------------------|-----------------------------------------|----------------------------------------------------|
| No ha sido difícil<br><input type="checkbox"/> | Un poco difícil<br><input type="checkbox"/> | Muy difícil<br><input type="checkbox"/> | Extremadamente difícil<br><input type="checkbox"/> |
|------------------------------------------------|---------------------------------------------|-----------------------------------------|----------------------------------------------------|

Elaborado por los doctores Robert L. Spitzer, Janet B.W. Williams, Kurt Kroenke y colegas, mediante una subvención educativa otorgada por Pfizer Inc. No se requiere permiso para reproducir, traducir, presentar o distribuir.

## ANEXO 2: INVENTARIO DE ANSIEDAD DE BECK

### INVENTARIO DE ANSIEDAD DE BECK

Nombre \_\_\_\_\_ Edad \_\_\_\_\_

| Nº | PREGUNTAS                          | NADA | LIGERO | MODERADO | GRAVE |
|----|------------------------------------|------|--------|----------|-------|
| 1  | Insensibilidad física              | 0    | 1      | 2        | 3     |
| 2  | Acaloramiento                      | 0    | 1      | 2        | 3     |
| 3  | Debilidad en las piernas           | 0    | 1      | 2        | 3     |
| 4  | Incapacidad para relajarme         | 0    | 1      | 2        | 3     |
| 5  | Temor a que suceda lo peor         | 0    | 1      | 2        | 3     |
| 6  | Mareas o vértigos                  | 0    | 1      | 2        | 3     |
| 7  | Aceleración del ritmo cardíaco     | 0    | 1      | 2        | 3     |
| 8  | Sensación de inestabilidad         | 0    | 1      | 2        | 3     |
| 9  | Sensación de estar aterrorizado    | 0    | 1      | 2        | 3     |
| 10 | Nerviosismo                        | 0    | 1      | 2        | 3     |
| 11 | Sensación de ahogo                 | 0    | 1      | 2        | 3     |
| 12 | Temblor en las manos               | 0    | 1      | 2        | 3     |
| 13 | Temblor generalizado               | 0    | 1      | 2        | 3     |
| 14 | Miedo a perder el control          | 0    | 1      | 2        | 3     |
| 15 | Dificultad para respirar           | 0    | 1      | 2        | 3     |
| 16 | Miedo a morir                      | 0    | 1      | 2        | 3     |
| 17 | Estar asustado                     | 0    | 1      | 2        | 3     |
| 18 | Indigestión o malestar del abdomen | 0    | 1      | 2        | 3     |
| 19 | Sensación de desmayo               | 0    | 1      | 2        | 3     |
| 20 | Ruborización facial                | 0    | 1      | 2        | 3     |
| 21 | Sudorización ( No al calor)        | 0    | 1      | 2        | 3     |

Responda este cuestionario considerando sus dificultades actuales. Considere como referencia las dificultades que ha tenido este último mes.

El Inventario de Ansiedad de Beck es una herramienta útil para valorar los síntomas somáticos de ansiedad, tanto en desórdenes de ansiedad como en cuadros depresivos.

El cuestionario consta de 21 preguntas, proporcionando un rango de puntuación entre 0 y 63. Los puntos de corte sugeridos para interpretar el resultado obtenido son los siguientes:

- 00–21 - Ansiedad muy baja
- 22–35 - Ansiedad moderada
- más de 36 - Ansiedad severa

Cada ítem se puntúa de 0 a 3, correspondiendo la puntuación 0 a "en absoluto", 1 a "levemente, no me molesta mucho", 2 a "moderadamente, fue muy desagradable pero podía soportarlo" y la puntuación 3 a "severamente, casi no podía soportarlo".

La puntuación total es la suma de las de todos los ítems. Los síntomas hacen referencia a la última semana y al momento actual.

### **ANEXO 3: ENCUESTA DE SATISFACCIÓN**

**1: ¿Qué le pareció el procedimiento?**

- a) *Muy cómodo*
- b) *Algo cómodo*
- c) *Ni cómodo ni incómodo*
- d) *Algo Incómodo*
- e) *Muy incómodo*

**2: En caso de ser necesario, ¿se repetiría el estudio de la misma manera?**

- a) *Si*
- b) *No*
- c) *Tal vez*

**3: ¿Sintió dolor durante el estudio, o se encuentra con dolor en este momento?**

- a) *Si*
- b) *No*

**4: ¿Recomendaría esta modalidad de estudio a sus familiares o amigos?**

- a) *Si*
- b) *No*
- c) *Tal vez*

**5: Del 1 al 10, ¿Cómo sintió usted que fue tratado?**

R: \_\_\_\_\_
